# Supplementary material for: Pueraria montana Population Structure and Genetic Diversity Based on Chloroplast Genome Data
Source: MDPI journal article supplement (doi:10.3390/plants12122231), 2023-06-06
Supplement: s1 [file s1]

Supplementary Materials

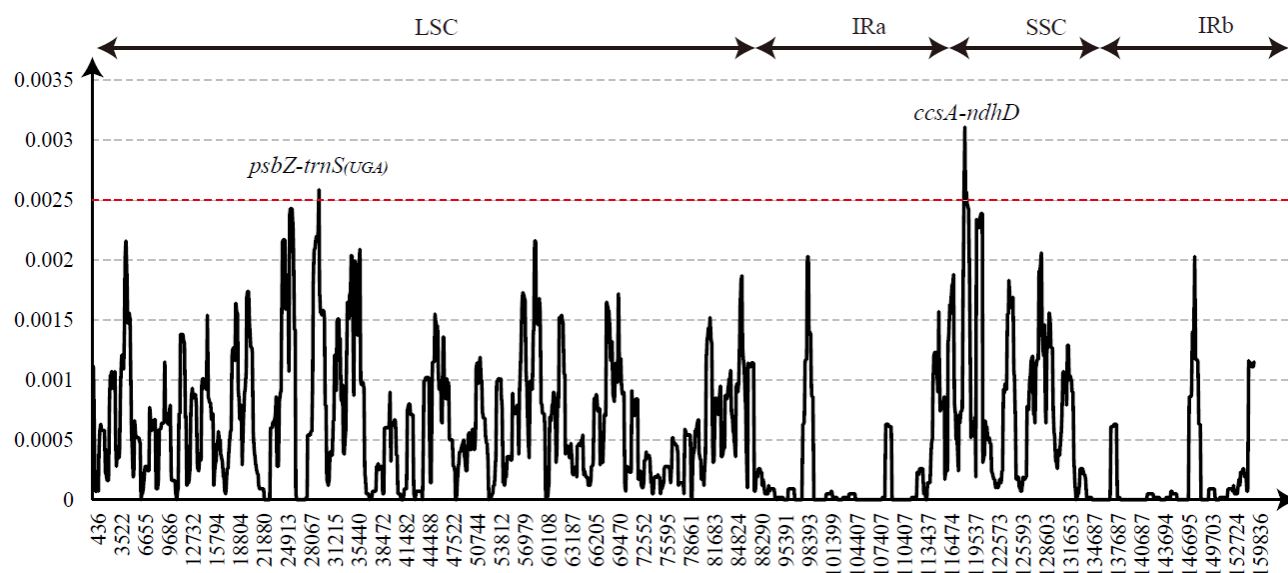

**Figure S1.** Nucleotide diversity ( $\pi$ ) in *P. montana*'s chloroplast genome based on a window size of 800 bp and a step size of 100 bp.

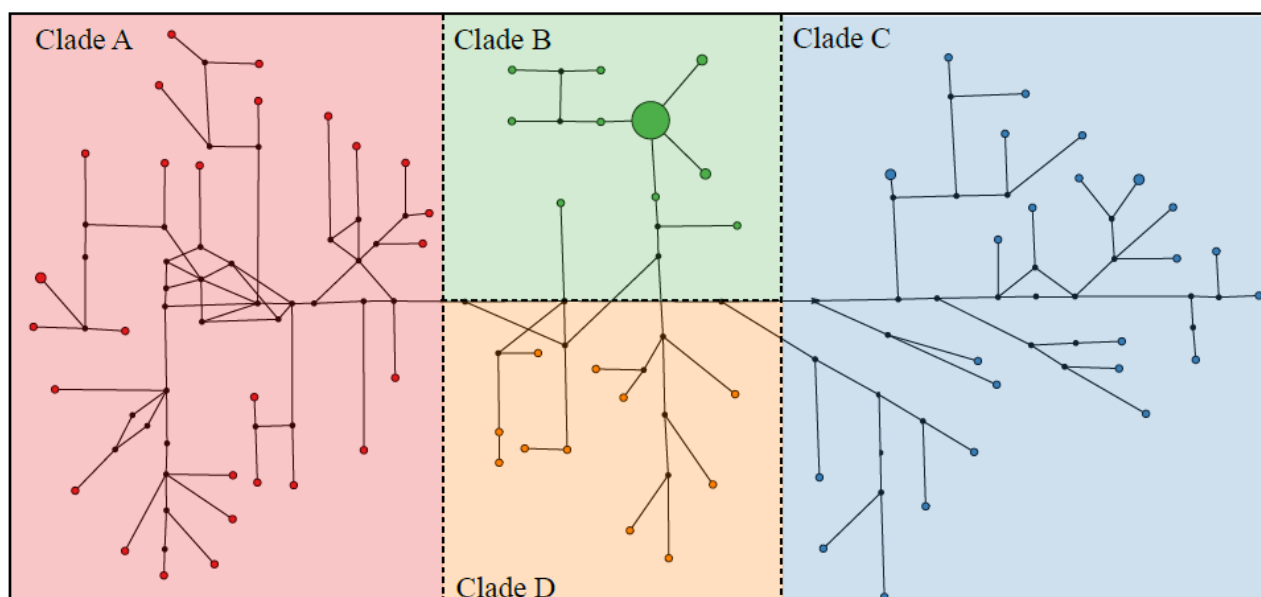

**Figure S2.** Network of all 104 *P. montana* accessions.

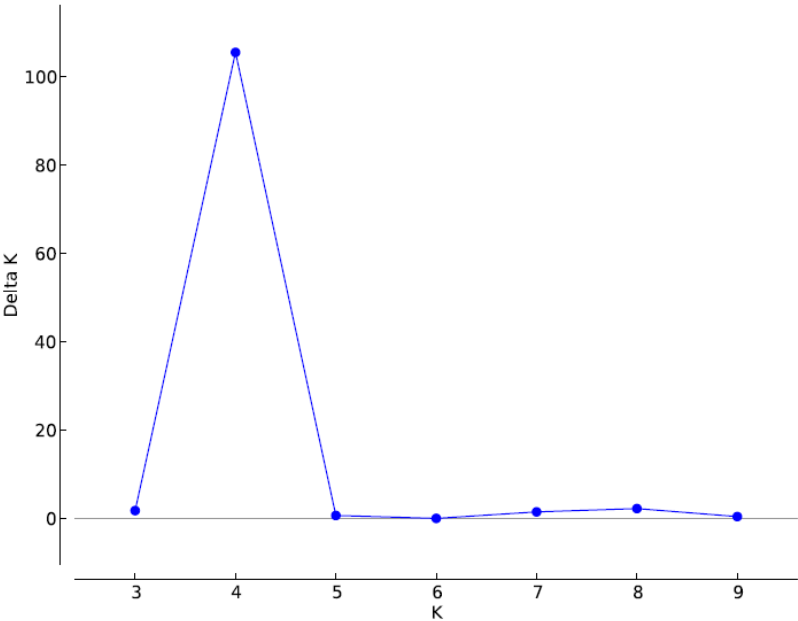

Figure S3. The delta K results of STRUCTURE analysis.

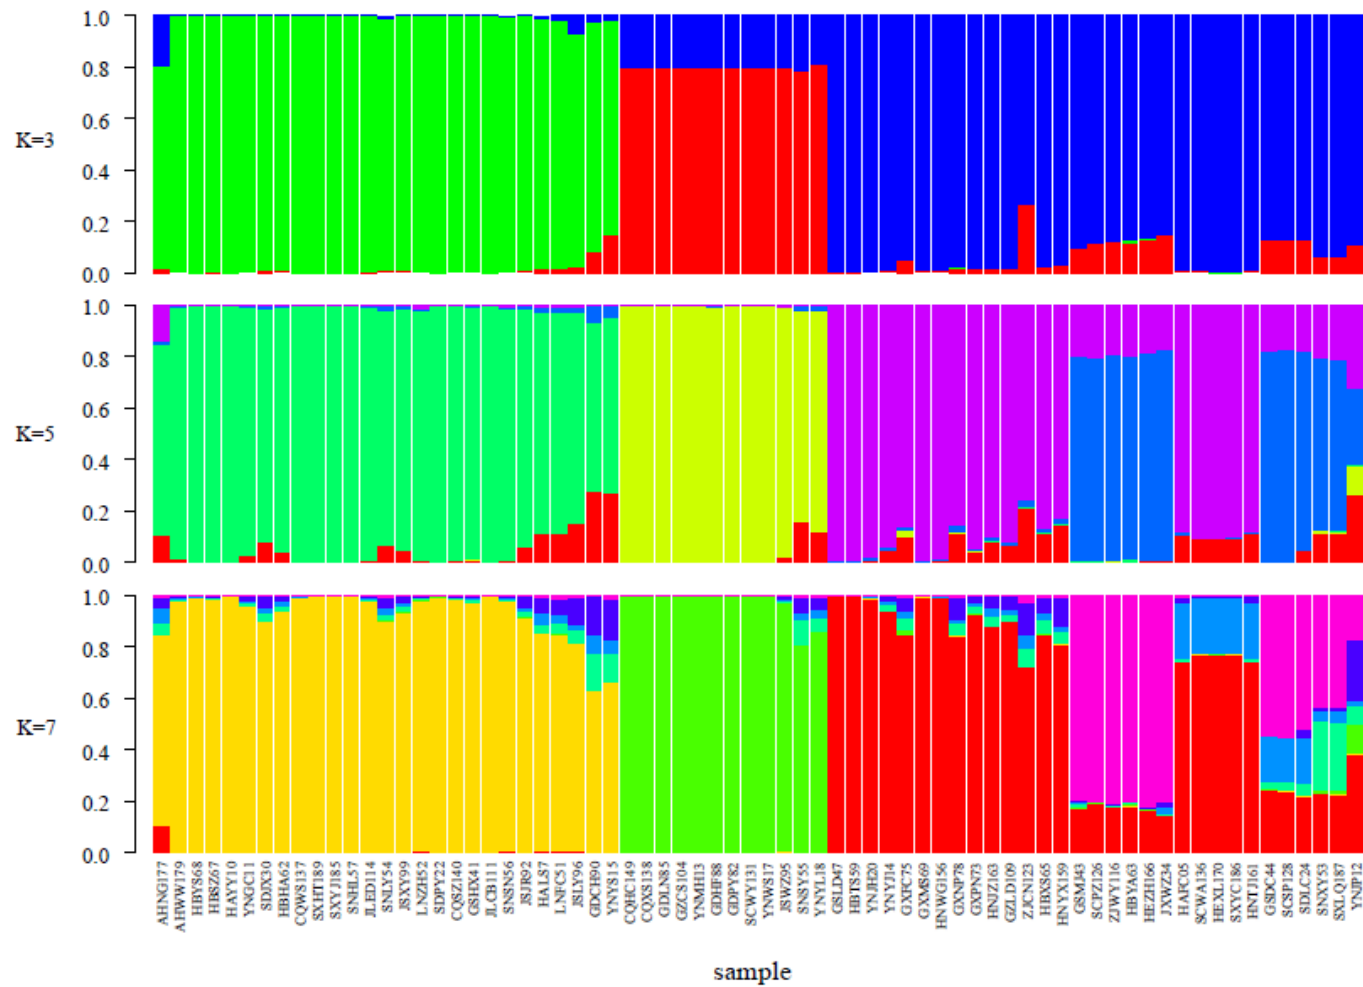

Figure S4. Population structure of all 104 accessions with K = 3, 5, and 6.

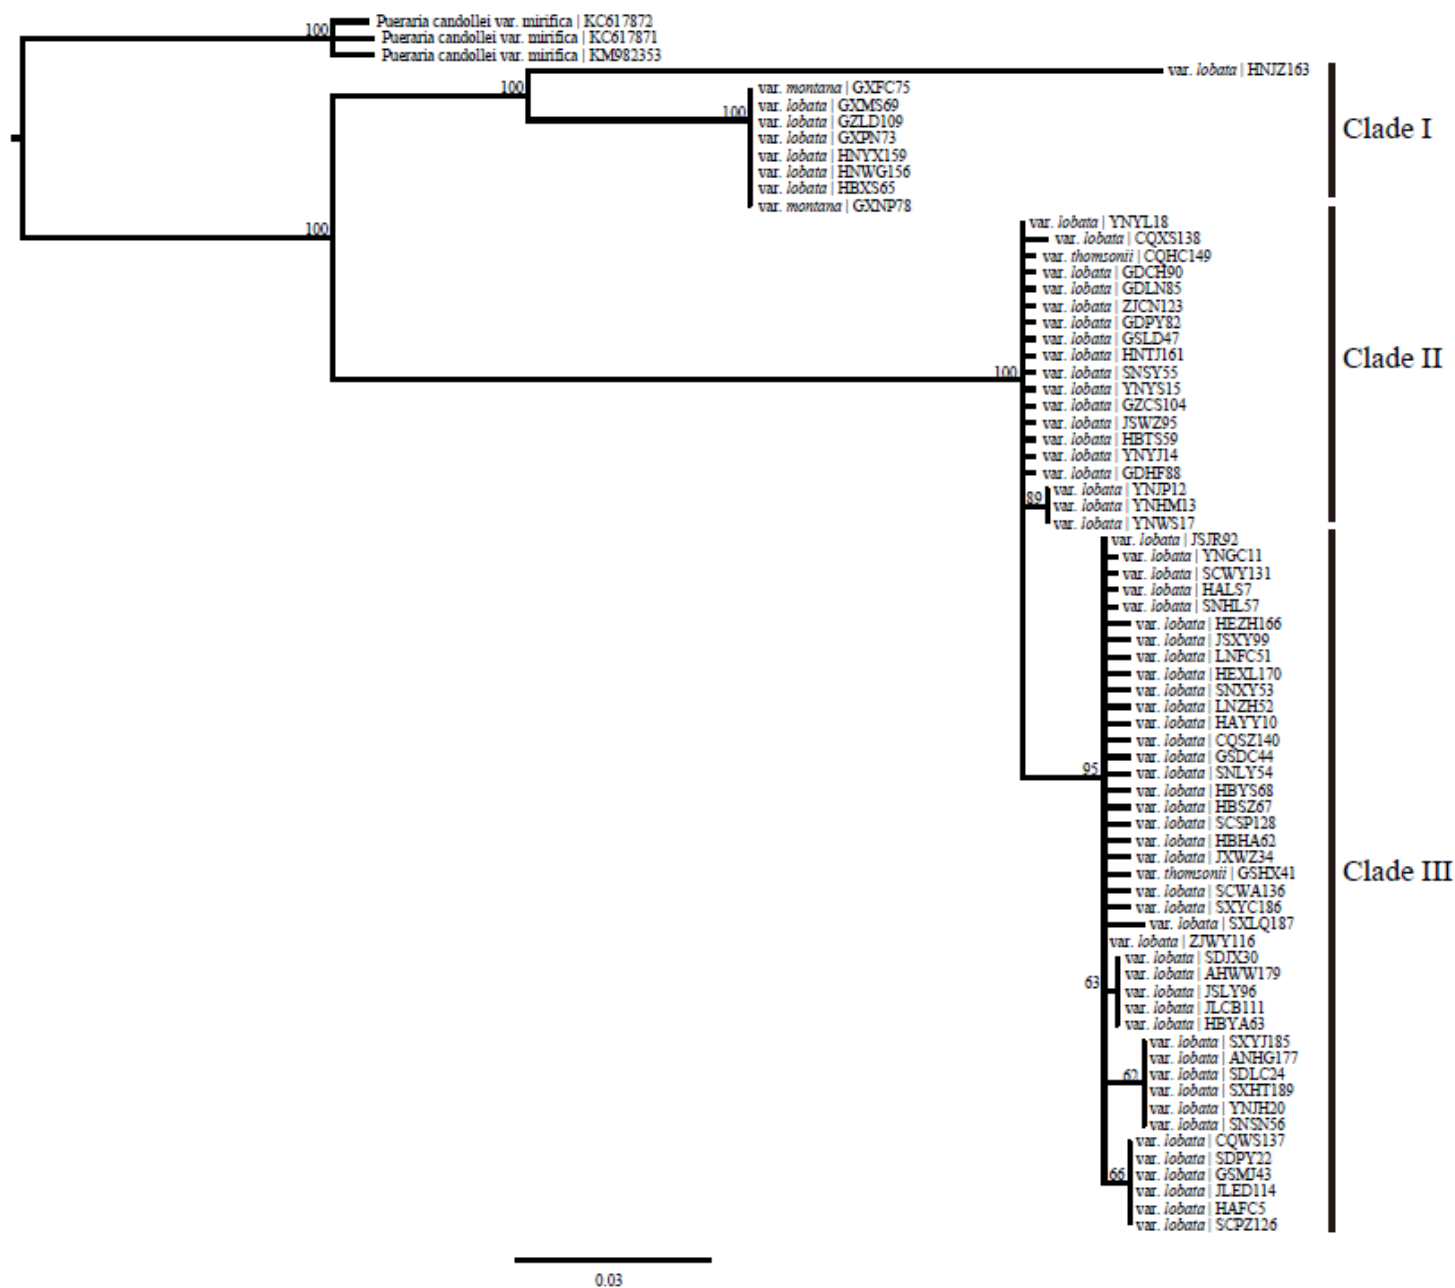

Figure S5. The ITS phylogenetic tree of 70 *P. montana* collected accessions.
