# Supplementary material for: Pueraria montana Population Structure and Genetic Diversity Based on Chloroplast Genome Data
Source: Plants (Basel). 2023 Jun 6;12(12):2231. doi: 10.3390/plants12122231 (PMC10302751; doi:10.3390/plants12122231)
Supplement: Supplementary file 1 [file plants-12-02231-s001.zip › Table S1. Detail information of 107 sequenced or downloaded chloroplast genomesv1.xlsx]

## Sheet: Sheet1
ID	Group	ITS Clades	Organism	Location	Total length (bp)	%GC in Total	LSC	%GC in LSC	SSC	%GC in SSC	IR	%GC in IR	Protein-coding genes	Transfer RNA genes	Ribosomal RNA genes	GB accession no.
Genbank	B	\	Pueraria montana	\	153360	0.354	84091	0.329	17989	0.289	25640	0.419	78	29	4	OM156457
Genbank	B	\	Pueraria montana var. lobata	\	153368	0.354	84107	0.329	17981	0.289	25640	0.419	78	29	4	OM156456
Genbank	B	\	Pueraria montana	\	153368	0.354	84119	0.329	17981	0.289	25634	0.419	78	29	4	OM156458
Genbank	B	\	Pueraria montana	\	153370	0.354	84114	0.329	17988	0.289	25634	0.419	78	29	4	OM135499
Genbank	Outgroup	\	Pueraria candollei var. mirifica	\	153373	0.355	84084	0.329	17975	0.29	25652	0.419	78	29	4	OM135503
Genbank	C	\	Pueraria montana var. thomsonii	\	153391	0.354	84124	0.329	17987	0.289	25640	0.419	78	29	4	OM156438
Genbank	C	\	Pueraria montana var. lobata	\	153391	0.354	84124	0.329	17987	0.289	25640	0.419	78	29	4	OM156439
Genbank	C	\	Pueraria montana var. thomsonii	\	153392	0.354	84125	0.329	17987	0.289	25640	0.419	78	29	4	OM156443
Genbank	C	\	Pueraria montana var. thomsonii	\	153392	0.354	84125	0.329	17987	0.289	25640	0.419	78	29	4	OM156444
Genbank	C	\	Pueraria montana var. thomsonii	\	153392	0.354	84125	0.329	17987	0.289	25640	0.419	78	29	4	OM156445
Genbank	C	\	Pueraria montana var. thomsonii	\	153392	0.354	84125	0.329	17987	0.289	25640	0.419	78	29	4	OM156446
Genbank	C	\	Pueraria montana var. lobata	\	153392	0.354	84125	0.329	17987	0.289	25640	0.419	78	29	4	OM156447
Genbank	C	\	Pueraria montana var. lobata	\	153392	0.354	84125	0.329	17987	0.289	25640	0.419	78	29	4	OM156448
Genbank	C	\	Pueraria montana var. thomsonii	\	153392	0.354	84125	0.329	17987	0.289	25640	0.419	78	29	4	OM156449
Genbank	C	\	Pueraria montana var. thomsonii	\	153392	0.354	84125	0.329	17987	0.289	25640	0.419	78	29	4	OM156450
Genbank	C	\	Pueraria montana var. lobata	\	153392	0.354	84125	0.329	17987	0.289	25640	0.419	78	29	4	OM156451
Genbank	C	\	Pueraria montana var. thomsonii	\	153392	0.354	84125	0.329	17987	0.289	25640	0.419	78	29	4	OM156452
Genbank	C	\	Pueraria montana var. thomsonii	\	153392	0.354	84125	0.329	17987	0.289	25640	0.419	78	29	4	OM156453
Genbank	C	\	Pueraria montana var. thomsonii	\	153392	0.354	84125	0.329	17987	0.289	25640	0.419	78	29	4	OM156454
Genbank	C	\	Pueraria montana var. lobata	\	153392	0.354	84125	0.329	17987	0.289	25640	0.419	78	29	4	OM156455
Genbank	C	\	Pueraria montana var. thomsonii	\	153397	0.354	84130	0.329	17987	0.289	25640	0.419	78	29	4	OM156440
Genbank	C	\	Pueraria montana var. thomsonii	\	153397	0.354	84130	0.329	17987	0.289	25640	0.419	78	29	4	OM156441
Genbank	C	\	Pueraria montana var. thomsonii	\	153397	0.354	84130	0.329	17987	0.289	25640	0.419	78	29	4	OM156442
Genbank	A	\	Pueraria montana var. lobata	\	153407	0.354	84113	0.329	17986	0.289	25654	0.419	78	29	4	OM135500
Genbank	C	\	Pueraria montana var. lobata	\	153407	0.354	84139	0.329	17986	0.289	25641	0.419	78	29	4	OM135501
Genbank	B	\	Pueraria montana var. lobata	\	153411	0.354	84142	0.328	17989	0.289	25640	0.419	78	29	4	MN180247
Genbank	B	\	Pueraria montana	\	153415	0.354	84154	0.329	17991	0.289	25635	0.419	78	29	4	OM135502
Genbank	B	\	Pueraria montana	\	153419	0.354	84148	0.329	17991	0.289	25640	0.419	78	29	4	OM156459
Genbank	C	\	Pueraria montana var. thomsonii	\	153441	0.354	84163	0.329	17998	0.289	25640	0.419	78	29	4	MZ901205
Genbank	C	\	Pueraria montana var. thomsonii	\	153442	0.354	84154	0.329	17999	0.289	23689	0.422	78	29	4	OM686894
Genbank	C	\	Pueraria montana var. lobata	\	153442	0.354	84163	0.329	17999	0.289	25640	0.419	78	29	4	MT818508
Genbank	C	\	Pueraria montana	\	153442	0.354	84163	0.329	17999	0.289	25640	0.419	78	29	4	MZ145063
Genbank	C	\	Pueraria montana var. thomsonii	\	153442	0.354	84163	0.329	17999	0.289	25640	0.419	78	29	4	OL547396
Genbank	Outgroup	\	Pueraria edulis	\	153524	0.354	84270	0.329	18002	0.289	25618	0.419	78	29	4	OM686893
Genbank	Outgroup	\	Pueraria edulis	\	153551	0.354	84255	0.329	18002	0.289	25642	0.419	78	29	4	OM048895
Genbank	C	\	Pueraria montana var. thomsonii	\	153673	0.354	84394	0.328	17999	0.289	25640	0.419	78	29	4	MZ145062
Genbank	C	\	Pueraria montana var. thomsonii	\	153673	0.354	84394	0.328	17999	0.289	25640	0.419	78	29	4	MZ895073
AHNG177	A	III	Pueraria montana var. lobata	Ningguo, Anhui	149637	0.353	84240	0.328	17991	0.289	23703	0.422	78	29	4	OP963859
AHWW179	A	III	Pueraria montana var. lobata	Wuwei, Anhui	149455	0.354	84059	0.329	17990	0.289	23703	0.422	78	29	4	OP963860
CQHC149	C	II	Pueraria montana var. thomsonii	Hechuan, Chongqing	153442	0.354	84163	0.329	17999	0.289	25640	0.419	78	29	4	OP963886
CQSZ140	A	III	Pueraria montana var. lobata	Shizhu, Chongqing	153429	0.354	84128	0.329	17993	0.289	25654	0.419	78	29	4	OP963876
CQWS137	A	III	Pueraria montana var. lobata	Wushan, Chongqing	153415	0.354	84158	0.329	17991	0.289	25633	0.419	78	29	4	OP963867
CQXS138	C	II	Pueraria montana var. lobata	Xiushan, Chongqing	153442	0.354	84163	0.329	17999	0.289	25640	0.419	78	29	4	OP963887
GDCH90	A	II	Pueraria montana var. lobata	Conghua, Guangdong	153445	0.354	84173	0.328	17976	0.289	25648	0.419	78	29	4	OP963884
GDHF88	C	II	Pueraria montana var. lobata	Haifeng, Guangdong	153441	0.354	84162	0.329	17999	0.289	25640	0.419	78	29	4	OP963891
GDLN85	C	II	Pueraria montana var. lobata	Liannan, Guangdong	153442	0.354	84163	0.329	17999	0.289	25640	0.419	78	29	4	OP963888
GDPY82	C	II	Pueraria montana var. lobata	Pingyuan, Guangdong	149540	0.353	84163	0.329	17999	0.289	23689	0.422	78	29	4	OP963892
GSDC44	D	III	Pueraria montana var. lobata	Dangchang, Gansu	153418	0.354	84152	0.329	17986	0.289	25640	0.419	78	29	4	OP963923
GSHX41	A	III	Pueraria montana var. thomsonii	Huixian, Gansu	153491	0.354	84199	0.328	17984	0.289	25654	0.419	78	29	4	OP963877
GSLD47	B	II	Pueraria montana var. lobata	Liangdang, Gansu	153411	0.354	84142	0.328	17989	0.289	25640	0.419	78	29	4	OP963898
GSMJ43	D	III	Pueraria montana var. lobata	Maiji, Gansu	153347	0.354	84115	0.328	17962	0.289	25635	0.419	78	29	4	OP963912
GXFC75	B	I	Pueraria montana var. montana	Fangchenggang, Guangxi	149505	0.353	84143	0.329	17984	0.289	23689	0.422	78	29	4	OP963902
GXMS69	B	I	Pueraria montana var. lobata	Mashan, Guangxi	149538	0.353	84167	0.328	17993	0.289	23689	0.422	78	29	4	OP963903
GXNP78	B	I	Pueraria montana var. montana	Napo, Guangxi	153406	0.354	84139	0.329	17987	0.289	25640	0.419	78	29	4	OP963905
GXPN73	B	I	Pueraria montana var. lobata	Pingnan, Guangxi	153437	0.354	84169	0.328	17988	0.289	25640	0.419	78	29	4	OP963906
GZCS104	C	II	Pueraria montana var. lobata	Chishui, Guizhou	153442	0.354	84163	0.329	17999	0.289	25640	0.419	78	29	4	OP963889
GZLD109	B	I	Pueraria montana var. lobata	Luodian, Guizhou	153467	0.354	84197	0.328	17990	0.289	25640	0.419	78	29	4	OP963908
HAFC05	B	III	Pueraria montana var. lobata	Fangcheng, Henan	153374	0.354	84082	0.329	18012	0.289	25640	0.419	78	29	4	OP963918
HALS7	A	III	Pueraria montana var. lobata	Lushan, Henan	153560	0.354	84272	0.328	17980	0.289	25654	0.419	78	29	4	OP963881
HAYY10	A	III	Pueraria montana var. lobata	Yiyang, Henan	153396	0.354	84096	0.329	17990	0.289	25655	0.419	78	29	4	OP963863
HBHA62	A	III	Pueraria montana var. lobata	Hongan, Hubei	153349	0.354	84077	0.329	17992	0.289	25640	0.419	78	29	4	OP963866
HBSZ67	A	III	Pueraria montana var. lobata	Suizhou, Hubei	149452	0.354	84055	0.329	17991	0.289	23703	0.422	78	29	4	OP963862
HBTS59	B	II	Pueraria montana var. lobata	Tongshan, Hubei	153413	0.354	84143	0.328	17990	0.289	25640	0.419	78	29	4	OP963899
HBXS65	B	I	Pueraria montana var. lobata	Xingshan, Hubei	153467	0.354	84202	0.329	17985	0.289	25640	0.419	78	29	4	OP963910
HBYA63	D	III	Pueraria montana var. lobata	Yuanan, Hubei	149498	0.353	84160	0.328	17958	0.289	23690	0.422	78	29	4	OP963915
HBYS68	A	III	Pueraria montana var. lobata	Yingshan, Hubei	149489	0.354	84094	0.329	17989	0.289	23703	0.422	78	29	4	OP963861
HEXL170	B	III	Pueraria montana var. lobata	Xinglong, Hebei	153414	0.354	84131	0.329	18006	0.289	25638	0.419	78	29	4	OP963920
HEZH166	D	III	Pueraria montana var. lobata	Zanhuang, Hebei	149475	0.353	84138	0.328	17957	0.289	23690	0.422	78	29	4	OP963916
HNJZ163	B	III	Pueraria montana var. lobata	Jingzhou, Hunan	153433	0.354	84165	0.329	17988	0.289	25640	0.419	78	29	4	OP963907
HNTJ161	B	II	Pueraria montana var. lobata	Taojiang, Hunan	149483	0.353	84098	0.329	18007	0.289	23689	0.422	78	29	4	OP963922
HNWG156	B	I	Pueraria montana var. lobata	Wugang, Hunan	153417	0.354	84150	0.328	17987	0.289	25640	0.419	78	29	4	OP963904
HNYX159	B	I	Pueraria montana var. lobata	Youxian, Hunan	149494	0.353	84131	0.329	17985	0.289	23689	0.422	78	29	4	OP963911
JLCB111	A	III	Pueraria montana var. lobata	Changbai, Jilin	149511	0.353	84115	0.329	17990	0.289	23703	0.422	78	29	4	OP963878
JLED114	A	III	Pueraria montana var. lobata	Erdaojiang, Jilin	153467	0.354	84157	0.329	18002	0.289	25654	0.419	78	29	4	OP963871
JSJR92	A	III	Pueraria montana var. lobata	Jurong, Jiangsu	149499	0.354	84165	0.329	17978	0.289	23678	0.422	78	29	4	OP963880
JSLY96	A	III	Pueraria montana var. lobata	Lianyungang, Jiangsu	153466	0.354	84167	0.329	17991	0.289	25654	0.419	78	29	4	OP963883
JSWZ95	C	II	Pueraria montana var. lobata	Suzhou, Jiangsu	153452	0.354	84173	0.329	17999	0.289	25640	0.419	78	29	4	OP963895
JSXY99	A	III	Pueraria montana var. lobata	Xuyu, Jiangsu	149578	0.353	84178	0.329	17994	0.289	23703	0.422	78	29	4	OP963873
JXWZ34	D	III	Pueraria montana var. lobata	Wanzai, Jiangsu	153357	0.354	84128	0.329	17957	0.289	25636	0.419	78	29	4	OP963917
LNFC51	A	III	Pueraria montana var. lobata	Fengcheng, Liaoning	153510	0.354	84214	0.328	17988	0.289	25654	0.419	78	29	4	OP963882
LNZH52	A	III	Pueraria montana var. lobata	Zhuanghe, Liaoning	153475	0.354	84172	0.329	17995	0.289	25654	0.419	78	29	4	OP963874
SCPZ126	D	III	Pueraria montana var. lobata	Pengzhou, Sichuan	153383	0.354	84155	0.328	17960	0.289	25634	0.419	78	29	4	OP963913
SCSP128	D	III	Pueraria montana var. lobata	Songpan, Sichuan	153418	0.354	84152	0.329	17986	0.289	25640	0.419	78	29	4	OP963924
SCWA136	B	III	Pueraria montana var. lobata	Wanyuan, Sichuan	153365	0.354	84073	0.329	18012	0.289	25640	0.419	78	29	4	OP963919
SCWY131	C	III	Pueraria montana var. lobata	Weiyuan, Sichuan	149540	0.353	84163	0.329	17999	0.289	23689	0.422	78	29	4	OP963893
SDJX30	A	III	Pueraria montana var. lobata	Juxian, Shandong	153382	0.354	84084	0.329	17990	0.289	25654	0.419	78	29	4	OP963865
SDLC24	D	III	Pueraria montana var. lobata	Laicheng, Shandong	153450	0.354	84178	0.328	17992	0.289	25640	0.419	78	29	4	OP963925
SDPY22	A	III	Pueraria montana var. lobata	Pingyi, Shandong	153457	0.354	84154	0.329	17995	0.289	25654	0.419	78	29	4	OP963875
SNHL57	A	III	Pueraria montana var. lobata	Huanglong, Shaanxi	149522	0.354	84167	0.329	17991	0.289	23682	0.422	78	29	4	OP963870
SNLY54	A	III	Pueraria montana var. lobata	Lueyang, Shaanxi	149513	0.353	84116	0.329	17991	0.289	23703	0.422	78	29	4	OP963872
SNSN56	A	III	Pueraria montana var. lobata	Shangnan, Shaanxi	153415	0.354	84117	0.329	17990	0.289	25654	0.419	78	29	4	OP963879
SNSY55	C	II	Pueraria montana var. lobata	Shanyang, Shaanxi	153442	0.354	84163	0.328	17999	0.289	25640	0.419	78	29	4	OP963896
SNXY53	D	III	Pueraria montana var. lobata	Xunyang, Shaanxi	153365	0.354	84114	0.329	17974	0.289	25638	0.419	78	29	4	OP963926
SXHT189	A	III	Pueraria montana var. lobata	Hongdong, Shanxi	153412	0.354	84155	0.329	17991	0.289	25633	0.419	78	29	4	OP963868
SXLQ187	D	III	Pueraria montana var. lobata	Lingqiu, Shanxi	153374	0.354	84123	0.329	17974	0.289	25638	0.419	78	29	4	OP963927
SXYC186	B	III	Pueraria montana var. lobata	Yangcheng, Shanxi	153421	0.354	84134	0.329	18008	0.289	25639	0.419	78	29	4	OP963921
SXYJ185	A	III	Pueraria montana var. lobata	Yongji, Shanxi	153401	0.354	84144	0.329	17991	0.289	25633	0.419	78	29	4	OP963869
YNGC11	A	III	Pueraria montana var. lobata	Gucheng, Yunnan	153404	0.354	84105	0.329	17991	0.289	25654	0.419	78	29	4	OP963864
YNJH20	B	III	Pueraria montana var. lobata	Jinghong, Yunnan	153441	0.354	84171	0.328	17990	0.289	25640	0.419	78	29	4	OP963900
YNJP12	C	II	Pueraria montana var. lobata	Jinping, Yunnan	153446	0.354	84149	0.329	18017	0.289	25640	0.419	78	29	4	OP963928
YNMH13	C	II	Pueraria montana var. lobata	Menghai, Yunnan	153442	0.354	84163	0.329	17999	0.289	25640	0.419	78	29	4	OP963890
YNWS17	C	II	Pueraria montana var. lobata	Weishan, Yunnan	149540	0.353	84163	0.329	17999	0.289	23689	0.422	78	29	4	OP963894
YNYJ14	B	II	Pueraria montana var. lobata	Yuanjiang, Yunnan	153338	0.354	84068	0.329	17990	0.289	25640	0.419	78	29	4	OP963901
YNYL18	C	II	Pueraria montana var. lobata	Yulong, Yunnan	154595	0.354	85316	0.329	17999	0.289	25640	0.419	78	29	4	OP963897
YNYS15	A	II	Pueraria montana var. lobata	Yongsheng, Yunnan	153522	0.354	84254	0.328	17972	0.289	25648	0.419	78	29	4	OP963885
ZJCN123	B	II	Pueraria montana var. lobata	Cangnan, Zhejiang	153378	0.354	84112	0.328	17986	0.289	25640	0.419	78	29	4	OP963909
ZJWY116	D	III	Pueraria montana var. lobata	Wuyi, Zhejiang	153363	0.354	84133	0.328	17960	0.289	25635	0.419	78	29	4	OP963914
